# Supplementary material
Source: PubMed Central journal article supplement (PMC4688160)
Supplement: NIHMS730846-supplement-Supp_MaterialS1.pdf [file NIHMS730846-supplement-Supp_MaterialS1.pdf]

## Supporting Information

**Thymosin beta 4 up-regulates miR-200a expression and induces differentiation and survival of rat brain progenitor cells.**

**Manoranjan Santra<sup>1</sup>, Michael Chopp<sup>1,2</sup>, Sutapa Santra<sup>1</sup>, Ankita Nallani<sup>1</sup>, Shivam Vyas<sup>1</sup>, Zheng Gang Zhang<sup>1</sup> and Daniel C. Morris<sup>3</sup>**

<sup>1</sup>Department of Neurology, Henry Ford Health System, Detroit, MI, 48202,

<sup>2</sup>Department of Physics, Oakland University, Rochester, MI, 48309 and

<sup>3</sup>Department of Emergency Medicine, Henry Ford Health System, Detroit, MI 48202

To whom correspondence should be addressed: Manoranjan Santra, Department of Neurology, Henry Ford Health System, Detroit, MI, 48202, USA, Tel: (313)-916-2399; Fax: (313)-916-1318; E-mail: [santra@neuro.hfh.edu](mailto:santra@neuro.hfh.edu)

**Keywords:** Thymosin beta 4, MicroRNA, epidermal growth factor receptor (EGFR), growth factor receptor-bound protein 2 (GRB2), AKT, phosphatase and tensin homologue (PTEN), p53, myelin basic protein (MBP), Progenitor cells, oligodendrocytes

**Running Title:** Thymosin beta 4 up-regulates miR-200a

## Supporting Information

### Supplementary Methods

#### Immunohistochemistry

Immuno-fluorescence staining was performed on primary rat embryonic OPCs, as previously described (Santra M 2014). These cells were fixed with 4% paraformaldehyde for 1h, washed with PBS, blocked with 1% serum for 1h and incubated with monoclonal antibodies of OPC specific marker O4, (1:1000, Chemicon, Billerica, MA, USA for one hour, rinsed with PBS and secondary antibodies labeled with fluorescein isothiocyanate (FITC- green fluorescence) for 1h. The slides were counterstained with 4', 6- diamidino-2-phenylindole (DAPI- blue fluorescence) and examined under Fluorescent Illumination Microscope (Olympus IX71/IX51, Tokyo, Japan). The O4 positive cells were quantified by counting in at least three slides per experiment. DAPI positive cells were considered as total number of cells. The OPCs which achieved greater than 90% O4 positive were utilized for all experiments.

For paraffin embedded slides, rats were anesthetized and sacrificed on day 58 after MCAO, as previously described (Santra M 2010). Perfusion of the animals, removal and fixation of brain tissue, sectioning of brain tissues into seven coronal blocks (1 mm thick), and processing for paraffin-embedded slides were performed, as previously described (Santra et al., 2006a, 2009). These paraffin-embedded slides were immunostained with DAB for FOG-2 (1:500; Santa Cruz Biotechnology, Dallas, Texas, USA) and rabbit polyclonal antibodies (1:200) for Grb2, Mig-6, Pten, p53 (Cell Signaling Technology, Danver, MA, USA), as previously described (Santra et al., 2006a, 2009).

#### **Oxygen Glucose Deprivation (OGD) and Terminal deoxynucleotidyl transferase dUTP nick end labeling (TUNEL) assay**

The cells were cultured for 4 days. On day 2, the cells were rinsed twice with serum free and glucose free media. The cells were subjected to OGD by incubating for 4h with minimum volume of serum free and glucose free medium in hypoxia without oxygen in an airtight Plexiglas humidified chamber (Anaerobic Environment, Sheldon), as previously described (Santra M 2006a, Santra M 2006b). This anaerobic chamber was maintained at 37°C and continuously gassed with a mixture of 99% N<sub>2</sub>/1% CO<sub>2</sub>/0% O<sub>2</sub>. After OGD for 4h, the cells were returned to normal condition and Tβ<sub>4</sub> treatment by replacing serum free and glucose free medium with the same medium as cultured on day 1, and by incubating in aerobic chamber at 37°C for 2 more days before apoptosis analysis. On day 5, the cells were fixed with 4.5% para-formaldehyde solution, and TUNEL assay was performed to examine apoptosis as follows.

TUNEL staining was performed by using the Apoptosis Detection Kit, ApopTag Peroxidase according to the manufacturer's protocol (EMD Millipore, Billerica, MA, USA), as previously described (Santra *et al.* 2006, Santra M 2012). Color was developed after addition of diaminobenzidine (DAB) peroxidase substrate. Apoptosis was quantified by counting DAB stained TUNEL positive cells.

### **Quantitative real time PCR (qrtPCR)**

The extraction of total RNA and preparation of cDNA were performed, as previously described (Santra *et al.* 2011). The QrtPCR amplification was performed for 40 cycles in the following thermal cycle: 95°C for 30 s, 60°C. The QrtPCR amplification was done for 40 cycles in the following thermal cycle: 95°C for 30s, 60°C for 30s, and 72°C for 45s using SYBR green (Life Technologies, Grand Island, NY). The sequences for each primer are used, as previously reported (Santra *et al.* 2012) and provided in Supplementary Table-1. Each sample was tested in triplicate and all values were normalized to GAPDH. Values obtained from three independent

experiments were analyzed relative to gene expression data using the  $2^{-\Delta\Delta CT}$  method (Livak & Schmittgen 2001).

### **Preparation of luciferase constructs and assay**

The oligonucleotide sequences of microRNA-200 (miR-200) target site in 3' untranslated region (3'UTR) of Mig-6 mRNA were selected based on TargetScan Analysis (<http://www.mirbase.org>), as follows.

1. Conserved oligo: 5'-CTAGCGGCCGCTGGTTCCTATTTCAGTATTTCTGGGGATTG-3' (100% homologous to human, rat and mouse);
2. Mutated oligo: 5'-CTAGCGGCCGCTGGTTCCTATTACTCGCGTCCTGGGGATTG-3'

The sequence (ACTCGCG) in red font is mismatched/ mutated for miR-200 target site in 3'UTR of Mig-6 mRNA.

These oligonucleotide sequences contain 5'-Nhe I, 3'-Sal I, and Not I (next to Nhe I for clonal selection) restriction sites. These oligos were sub-cloned in pmiRGLO vector (Promega Corporation, WI, USA), carrying the firefly luciferase gene (*luc2*) under the control of the PGK promoter and the internal control renilla luciferase (*hRluc*) under the control of the SV40 promoter. These sub-clones were confirmed by DNA sequencing in GENEWIZ, South Plainfield, NJ, USA. For the luciferase assay, 50 ng of plasmid were transfected in SVZ-neurospheres and primary OPCs in 100 $\mu$ l of electroporation solution (Mirus Bio, Madison, WI, USA). In some experiments, as reported in the Results section, these cells were also co-transfected with 50ng of control lentiviral vector and lentiviral vectors carrying miR-200 cluster genes (Gregory PA 2008) e.g. miR-200b-200a-429 and miR-200c-141 (addgene, Cambridge, MA, USA). The appropriate Nucleofector Program for Nucleofector I Device (O-03 for SVZ-neurospheres and X-01 for OPCs) was selected. The transfected cells were suspended in appropriate growth medium, plated in 96 well plate and incubated in a humidified 37°C incubator. After 24 hours, Dual Luciferase assay was performed according to manufacturer's protocol (Promega

Corporation, WI, USA) to detect firefly luciferase and renilla luciferase activity in luminometer (Perkin Elmer, Waltham, MA, USA).

## References

- Gregory PA, B. A., Paterson EL, Barry SC, Tsykin A, Farshid G, Vadas MA, Khew-Goodall Y, Goodall GJ. (2008) The miR-200 family and miR-205 regulate epithelial to mesenchymal transition by targeting ZEB1 and SIP1. *Nat Cell Biol*, **10**, 593-601 PMID:18376396.
- Livak, K. J. and Schmittgen, T. D. (2001) Analysis of relative gene expression data using real-time quantitative PCR and the 2(-Delta Delta C(T)) Method. *Methods*, **25**, 402-408.
- Santra, M., Chopp, M., Zhang, Z. G., Lu, M., Santra, S., Nalani, A. and Morris, D. C. (2012) Thymosin beta 4 mediates oligodendrocyte differentiation by upregulating p38 MAPK. *Glia*, **60**, 1826-1838.
- Santra M, C. M., Zhang ZG, Lu M, Santra S, Nalani A, Santra S, Morris DC. (2012) Thymosin  $\beta$  4 mediates oligodendrocyte differentiation by upregulating p38 MAPK. . *Glia*, **60**, 1826-1838 PMID: 23073962
- Santra M, K. M., Zhang RL, Zhang ZG, Meng H, Jiang F, Chopp M. (2006a) Protection of adult mouse progenitor cells and human glioma cells by de novo decorin expression in an oxygen- and glucose-deprived cell culture model system. . *J Cereb Blood Flow Metab.*, **26**, 1311-1322 PMID: 16467781.
- Santra, M., Liu, X. S., Santra, S., Zhang, J., Zhang, R. L., Zhang, Z. G. and Chopp, M. (2006) Ectopic expression of doublecortin protects adult rat progenitor cells and human glioma cells from severe oxygen and glucose deprivation. *Neuroscience*, **142**, 739-752.
- Santra M, L. X., Santra S, Zhang J, Zhang RL, Zhang ZG, Chopp M. (2006b) Ectopic expression of doublecortin protects adult rat progenitor cells and human glioma cells from severe oxygen and glucose deprivation. *Neuroscience*. , **142**, 739-752 PMID: 16962712.

- Santra, M., Santra, S., Buller, B., Santra, K., Nallani, A. and Chopp, M. (2011) Effect of doublecortin on self-renewal and differentiation in brain tumor stem cells. *Cancer Sci*, **102**, 1350-1357.
- Santra M, Z. X., Roberts C, Santra S, Lu M, Panda S, Jiang F, Chopp M. (2010) Single doublecortin gene therapy significantly reduces glioma tumor volume. *J Neurosci Res*, **88**, 304-314 PMID: 19681167.
- Santra M, Z. Z., Yang J, Santra S, Santra S, Chopp M, Morris DC. (2014) Thymosin  $\beta$ 4 Upregulation of MicroRNA-146a Promotes Oligodendrocyte Differentiation and Suppression of the Toll-like Proinflammatory Pathway. *J Biol Chem.* , **289**, 19508-19518 PMID: 24828499

## Supplementary Table

**Table-1: Sequences of oligonucleotide primers used in qrtPCR Analysis.**

| Primer | Forward sequence            | Reverse sequence             |
|--------|-----------------------------|------------------------------|
| EGFR   | 5' -ACCGTGGAGAGAATCCCTTT-3' | 5' -TTGTTGCTAAATCGCACAGC-3'  |
| Mig-6  | 5' -AAGCAGAAGAAGCAAACCCA-3' | 5' -TCCATTTTCATTCTGGAGGC-3'  |
| Grb2   | 5' -CGATGAGCTGAGCTTCAAGA-3' | 5' -GAAGCCATCTTTCCCATTGA-3'  |
| FOG-2  | 5' -TTGAAGACGAAGGCTCAGGT-3' | 5' -TGCAGTTGTTTTTGTCTGTCC-3' |
| Pten   | 5' -ACCAGGACCAGAGGAAACCT-3' | 5' -CTTGTCATTATCCGCACGCT-3'  |
| P53    | 5' -CTTCGAGATGTTCCGAGAGC-3' | 5' -CTTCGGGTAGCTGGAGTGAG-3'  |
| GAPDH  | 5' -AGAACATCATCCCTGCATCC-3' | 5' -CACATTGGGGGTAGGAACAC-3'  |

Fig. S1

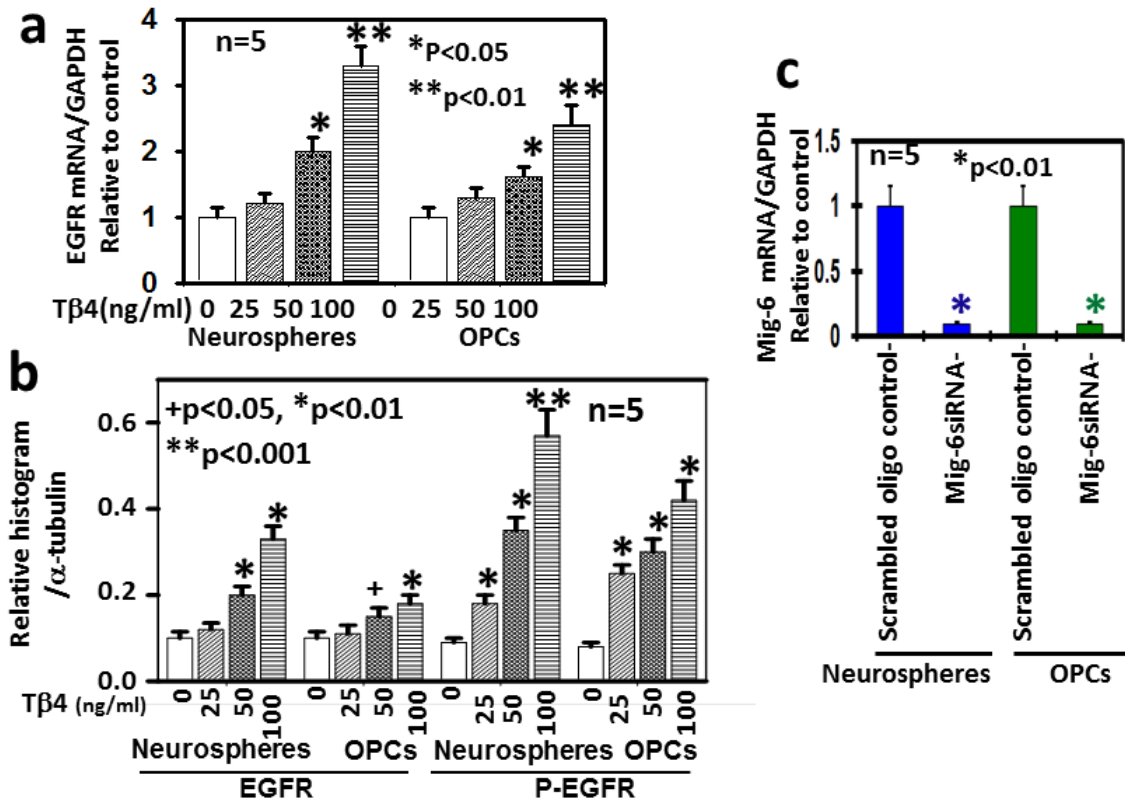

**Fig. S2**

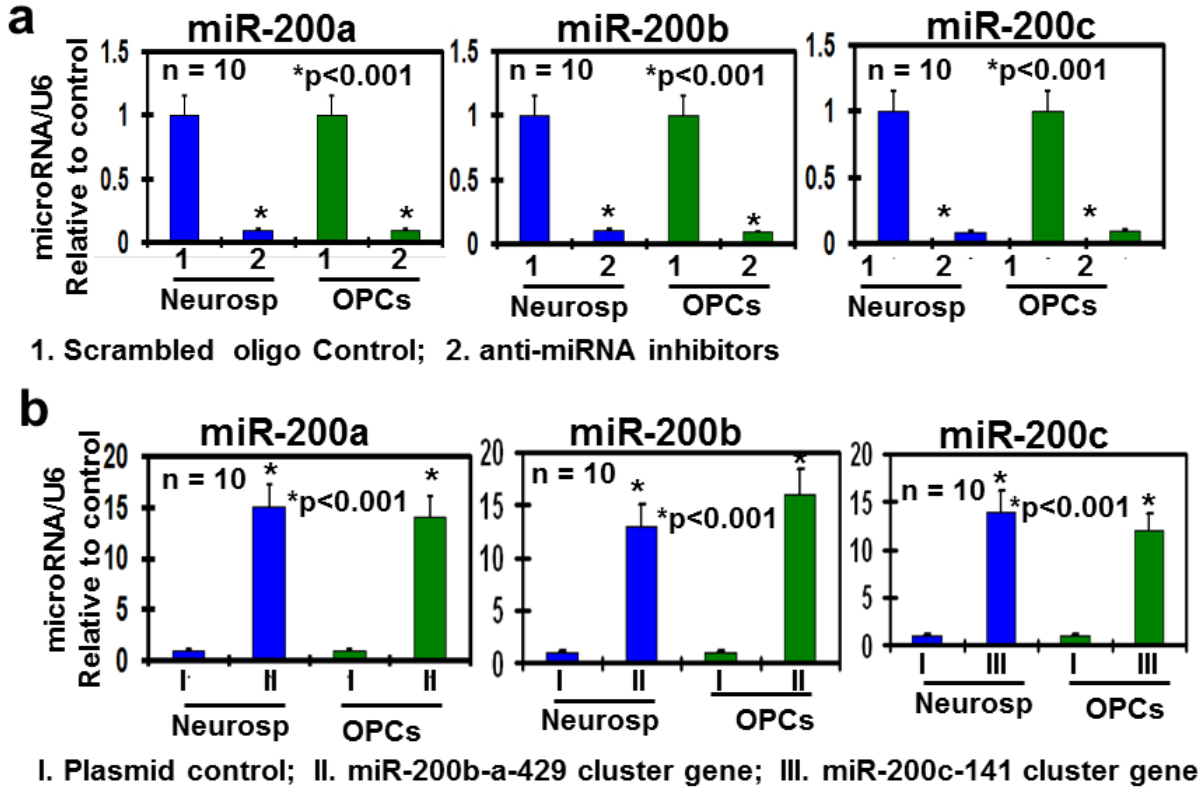



Fig. S3

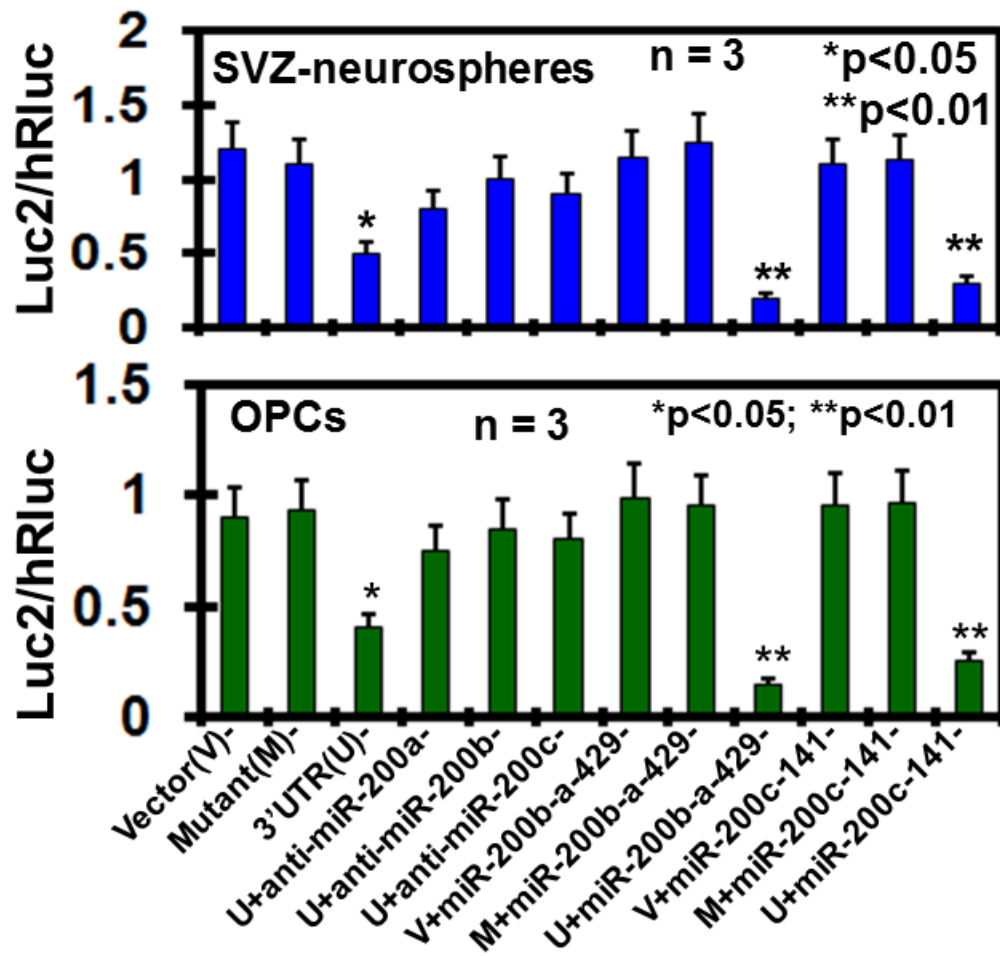

Fig. S4

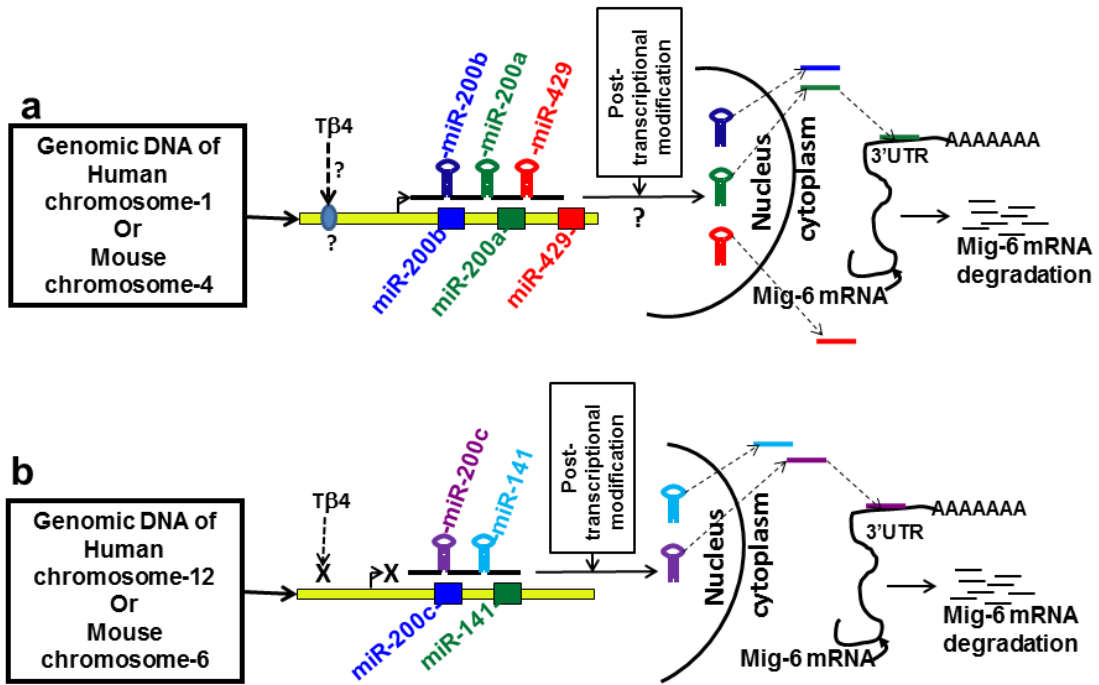

Fig. S5

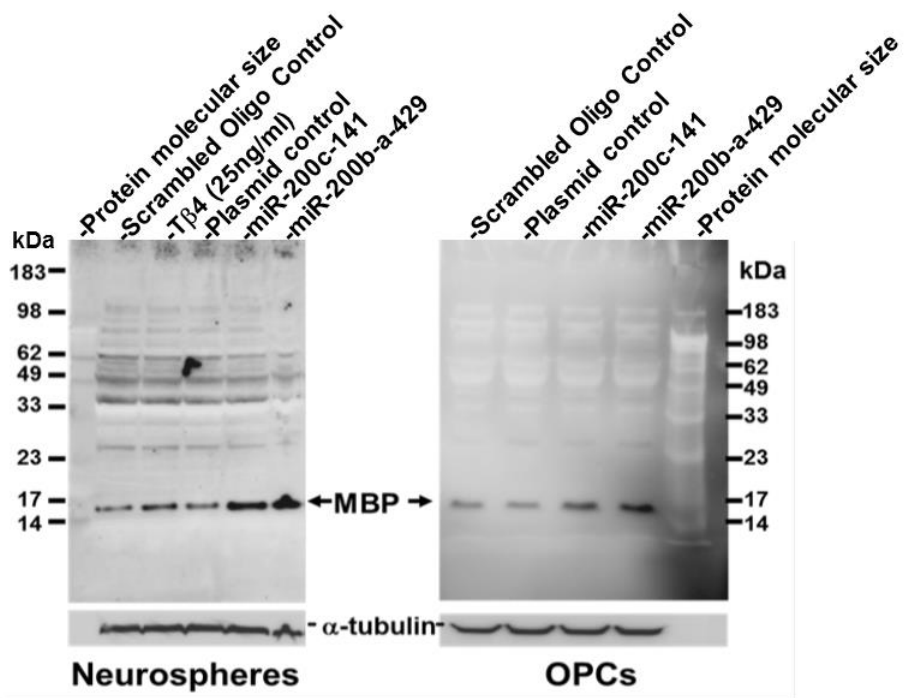

**Fig. 6**

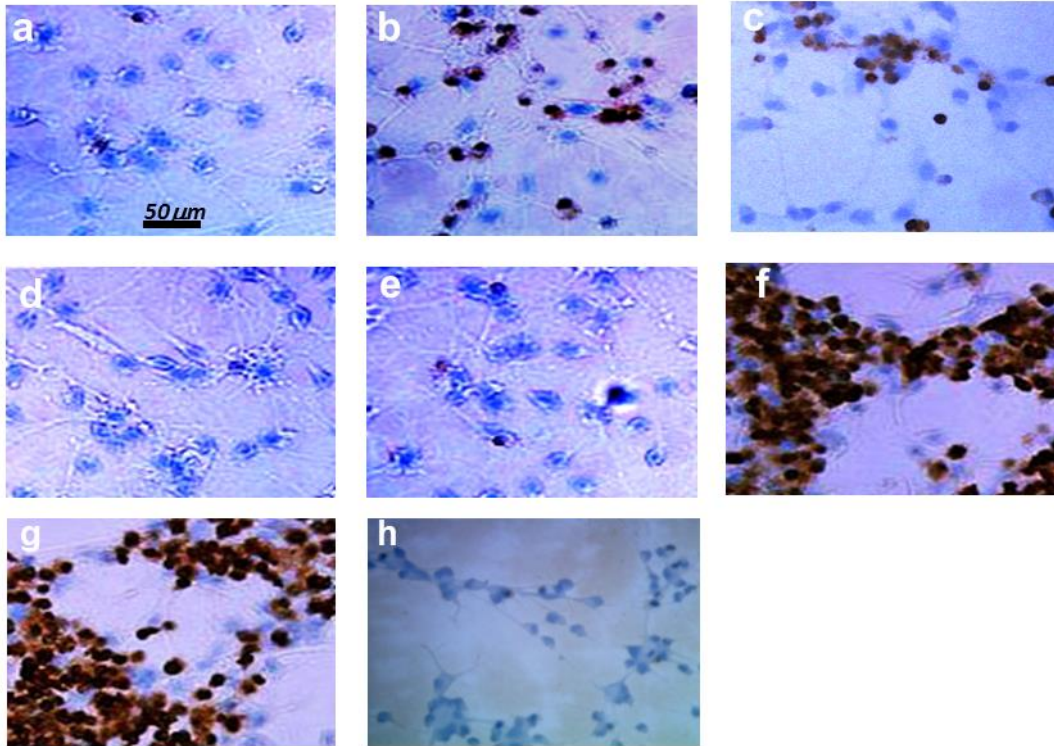

**Fig. 7**

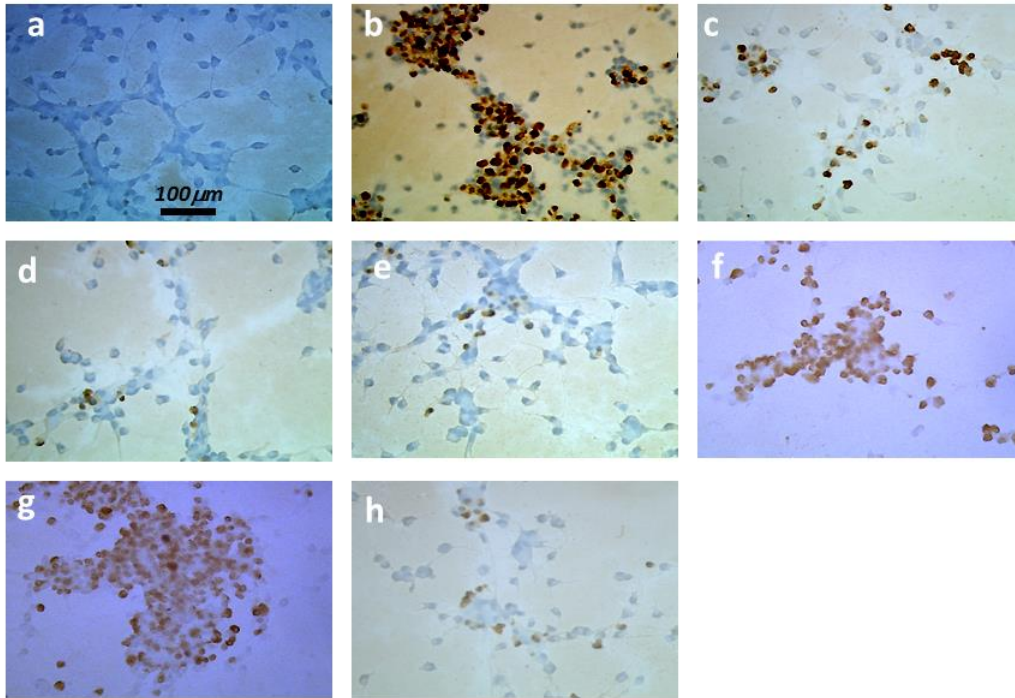

Fig. S8

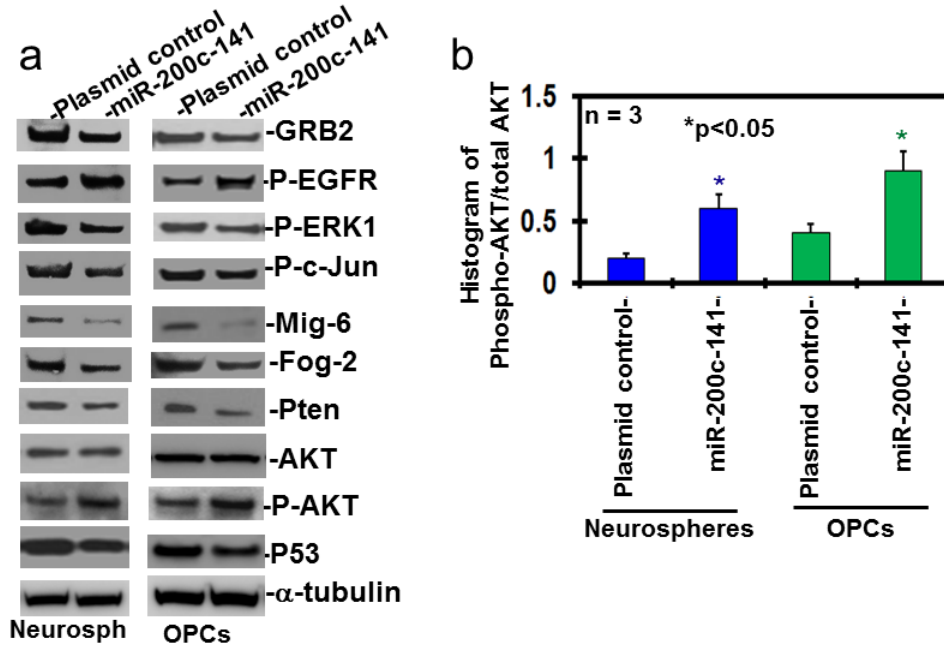

## Legends to supplementary figures

**Fig. S1 T $\beta$ 4 treatment induces expression of EGFR in rat SVZ progenitor cells and rat embryonic primary OPCs in a dose dependent manner.** The adult rat SVZ neurospheres/progenitor cells (Neurospheres) and rat embryonic primary OPCs (OPCs) were treated with T $\beta$ 4 at the dose of 0, 25, 50 and 100ng/ml in five independent experiments (n=5). After treatment, we analyzed EGFR mRNA expression by qrtPCR (a) and, expression of EGFR protein and phosphorylated EGFR (P-EGFR) by Western blot. Western blot data were quantified by histogram analysis (b) in Photoshop in five independent experiments (n=5). c) The qrtPCR was analyzed for Mig-6 in the adult rat SVZ neurospheres/progenitor cells (Neurospheres) and rat embryonic primary OPCs (OPCs) after transfection with scrambled oligo-nucleotide control (Oligo control) and Mig-6siRNA in five independent experiments (n=5). The p-value <0.05 was considered as significantly different.

**Fig. S2 Measurement of knockdown and overexpression efficiency of miR-200 by qrtPCR.** The SVZ-neurospheres (blue bars; Neurosp) and embryonic primary OPCs (green bars; OPCs) were transfected with scrambled oligo nucleotides, as scrambled oligo control (1) and anti-miR™ miRNA inhibitor corresponding to miR-200a, -200b and -200c as anti-miRNA inhibitor e.g. anti-miR-200a, -200c and -200c (2) in order to knockdown the expression of miR-200a, -200b and -200c, respectively. To determine knockdown efficiency after transfection of anti-miRNA inhibitors, individual microRNA (e.g. miR-200a, miR-200b and miR-200c as shown at the top of bar graph) was analyzed by qrtPCR in the top panel (a). In the bottom panel (b), the SVZ-neurospheres (blue bars; Neurosp) and embryonic primary OPCs (green bars; OPCs) were transfected with control lentiviral vector without insert as plasmid control (I), and lentiviral vector carrying miR-200b-a-429 cluster gene (II) and miR-200c-141cluster gene (III). To examine overexpression efficiency after cluster gene transfection, miR-200a and miR-200b

were measured after transfection of miR-200b-a-429 cluster gene (II) and, miR-200c was measured after transfection of miR-200c-141 cluster gene (III) by qrtPCR .

**Fig. S3 Luciferase assay for the reporter gene constructs of the pmirGLO vector carrying miR-200 target site in 3'UTR of Mig-6.** The pmirGLO vector (Vector), the pmirGLO vector construct carrying miR-200 target sequence from 3'UTR of Mig-6 (3'UTR) and the pmirGLO vector construct containing mismatched miR-200 target sequence from 3'UTR of Mig-6 (Mutant) were transfected in SVZ-neurospheres (Top bar graph) and embryonic primary OPCs (Bottom bar graph) followed by luciferase (luc2)/ renilla luciferase (hRluc) analysis to quantify direct target of miR-200 in 3'UTR of Mig-6 in three independent experiments. These pmirGLO vector construct (3'UTR) transfected cells were co-transfected with anti-miR-200a or anti-miR-200b or anti-miR-200c followed by luciferase (luc2)/ renilla luciferase (hRluc) analysis to determine whether anti-miR-200 transfections reverse direct target of mir-200 in 3'UTR of Mig-6 in three independent experiments. The pmirGLO vector and the pmirGLO vector constructs (3'UTR and mutant) transfected cells were co-transfected with Lenti-miR-200b-a-429 cluster gene or Lenti-miR-200c-141 cluster gene followed by luciferase (luc2)/ renilla luciferase (hRluc) analysis to examine whether overexpression of miR-200 enhances the effect of direct target of mir-200 to 3'UTR of Mig-6 in three independent experiments. The p-value <0.05, was considered as significantly different.

**Fig. S4 Schematic diagram of a single tricistronic primary miR-200b-a-429 cluster gene and a single bicistronic primary miR-200c-141 cluster gene.** In the nucleus, genomic DNA of human chromosome-1 or mouse chromosome-4 transcripts a single tricistronic primary miR-200b-a-429 cluster mRNA encoding miR-200b, miR-200a and miR-429 and genomic DNA of human chromosome-12 or mouse chromosome-6 contains a single bicistronic primary miR-200c-141 cluster gene encoding miR-200c and miR-141. These polycistronic transcripts undergo post transcriptional modifications and are processed into pre-miRNAs which are then



exported to the cytoplasm and further processed into mature microRNAs. T $\beta$ 4 treatment may promote unknown (?) transcription factor to bind and activate promoter of tricistronic primary miR-200b-a-429 cluster gene by unknown mechanism (?) and drive transcription. In contrast, this T $\beta$ 4-induced transcription factor may fail to bind (X) and activate (X) promoter of bicistronic primary miR-200c-141 cluster gene, because specific sequences for binding of transcription factor may be missing in this promoter of bicistronic primary miR-200c-141 cluster gene.

**Fig. S5 Western blot of MBP expression using whole blot in SVZ-neurosphere and embryonic primary OPCs.** SVZ-neurosphere and embryonic primary OPCs were transfected with scrambled oligonucleotides (scrambled oligo control), control lentiviral vector without insert (Plasmid control), and lentiviral vectors carrying miR-200c-141 cluster gene (miR-200c-141) and miR-200b-a-429 cluster gene (miR-200b-a-429). Pre-stained protein molecular weight standard (protein molecular size) and the protein samples were separated in 10% SDS-polyacrylamide gel for Western blot analysis. Note that the strongest protein band which ran at ~15 kDa (i.e. molecular weight of MBP) after blotting with MBP anti-body confirmed specificity of MBP antibody. Both controls- scrambled oligo and plasmid transfection showed the same amount of MBP expression. In contrast, MBP expression was elevated after miR-200c-141 and miR-200b-a-429 cluster gene transfection in SVZ-neurosphere and embryonic primary OPCs.

**Fig. S6 TUNEL staining of neurospheres/progenitor cells from adult ischemic rat SVZ.** TUNEL stainings with DAB were performed in the following samples. a) The adult rat SVZ neurospheres/progenitor cells were transfected with control plasmid and incubated for 4 days. b) The control cells (a) were subjected to OGD for 4h on day 2 during incubation for 4 days. c) The control cells (a) were treated with 50ng/ml T $\beta$ 4 for 4 days with exposure to OGD for 4h on day 2. d) The miR-200b-a-429 cluster transfected neurospheres/progenitor cells were subjected to OGD for 4h on day 2 during incubation for 4 days. e) The miR-200b-a-429 cluster transfected neurospheres/progenitor cells were treated with 50ng/ml T $\beta$ 4 for 4 days with

exposure to OGD for 4h on day 2. f) The anti-miR-200a transfected cells were subjected to OGD for 4h on day 2 during incubation for 4 days. g) The anti-miR-200a transfected cells were treated with 50ng/ml T $\beta$ 4 for 4 days with exposure to OGD for 4h on day 2. h) The miR-200c-141 cluster transfected neurospheres/progenitor cells were subjected to OGD for 4h on day 2 during incubation for 4 days.

**Fig. S7 TUNEL staining of primary OPCs from the rat embryos on embryonic day 17.**

TUNEL staining of primary OPCs was performed in the following samples. The control plasmid transfected primary OPCs (a) and control cells (a) subjected to OGD for 4h on day 2 (b), were incubated for 4 days. The control cells (a) were treated with 50ng/ml T $\beta$ 4 for 4 days with exposure to OGD for 4h on day 2 (c). The miR-200b-a-429 cluster transfected OPCs (d) were treated with 50ng/ml T $\beta$ 4 for 4 days (e) subjected to OGD for 4h on day 2. The anti-miR-200a transfected cells (f) were treated with 50ng/ml T $\beta$ 4 for 4 days (g) subjected to OGD for 4h on day 2. h) The miR-200c-141 cluster transfected OPCs were subjected to OGD for 4h on day 2 during incubation for 4 days.

**Fig. S8 Effect of miR-200c-141 cluster gene transfection on mediators of EGFR/ERK/c-Jun and EGFR/PI3K/AKT/p53 in SVZ-neurosphere and embryonic primary OPCs.**

Western blot analysis (a) was performed from total protein samples from SVZ-neurospheres (Neurosph) and embryonic primary OPCs (OPCs) after transfection with lentiviral vector as control (plasmid control) and lentiviral based miR-200c-141 cluster gene expression vector (miR-200c-141). Migration of proteins (mediators of EGFR signaling) was shown at right. Loading of the protein samples was normalized with  $\alpha$ -tubulin. b) AKT activity was quantified by ratio of phosphorylated AKT (P-AKT) and AKT in SVZ-neurospheres (Neurospheres) and embryonic primary OPCs (OPCs) from Western blot data in three independent experiments. The p-value <0.05, was considered as significantly different.
